# Supplementary material for: Zeolites and Biochar Modulate Olive Fruit and Oil Polyphenolic Profile
Source: MDPI journal article supplement (doi:10.3390/antiox11071332), 2022-07-06
Supplement: s1 [file s1]

Supplementary Results

Table S1. CV-ANOVA respective to the OPLS-DA of olive fruit phenolic compounds.

| M1(Untitled) | SS      | DF | MS       | F       | p        | SD       |
|--------------|---------|----|----------|---------|----------|----------|
| Total Corr.  | 34      | 34 | 1        |         |          | 1        |
| Regression   | 25.8987 | 18 | 1.43882  | 2.84167 | 0.020472 | 1.19951  |
| Residual     | 8.10126 | 16 | 0.506329 |         |          | 0.711568 |

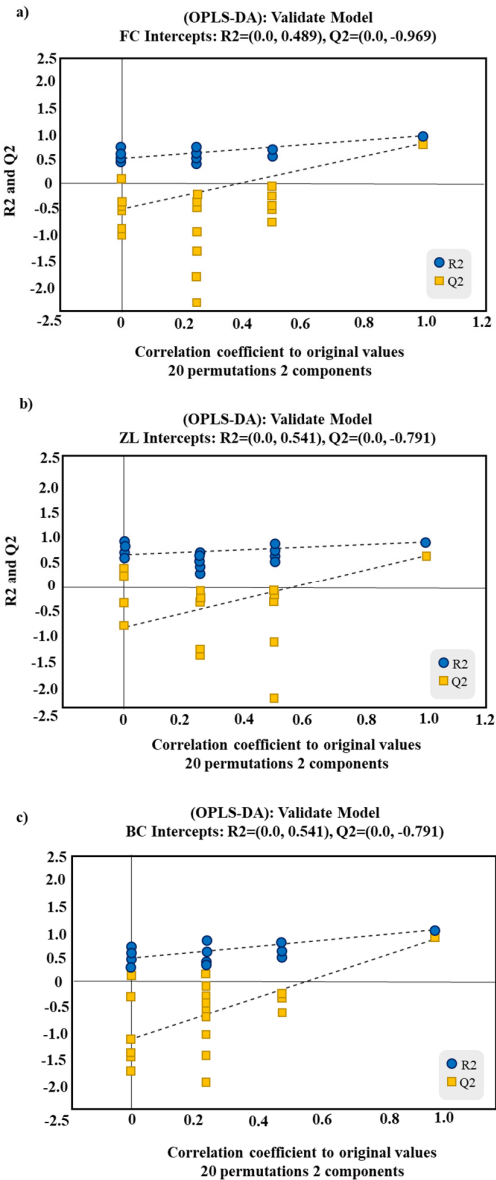

Figure S1. Permutation tests of OPLS-DA relative to the olive fruit phenolic compounds according to FC (a), ZL (b) and BC (c) treatments

**Table S2.** CV-ANOVA respective to the OPLS-DA of olive oil phenolic compounds.

| M1(Untitled) | SS      | DF | MS       | F       | <i>p</i>                 | SD      |
|--------------|---------|----|----------|---------|--------------------------|---------|
| Total Corr.  | 34      | 34 | 1        |         |                          | 1       |
| Regression   | 30.2492 | 14 | 2.16066  | 11.5212 | $1.13564 \times 10^{-4}$ | 1.46992 |
| Residual     | 3.75076 | 20 | 0.187538 |         |                          | 0.43057 |

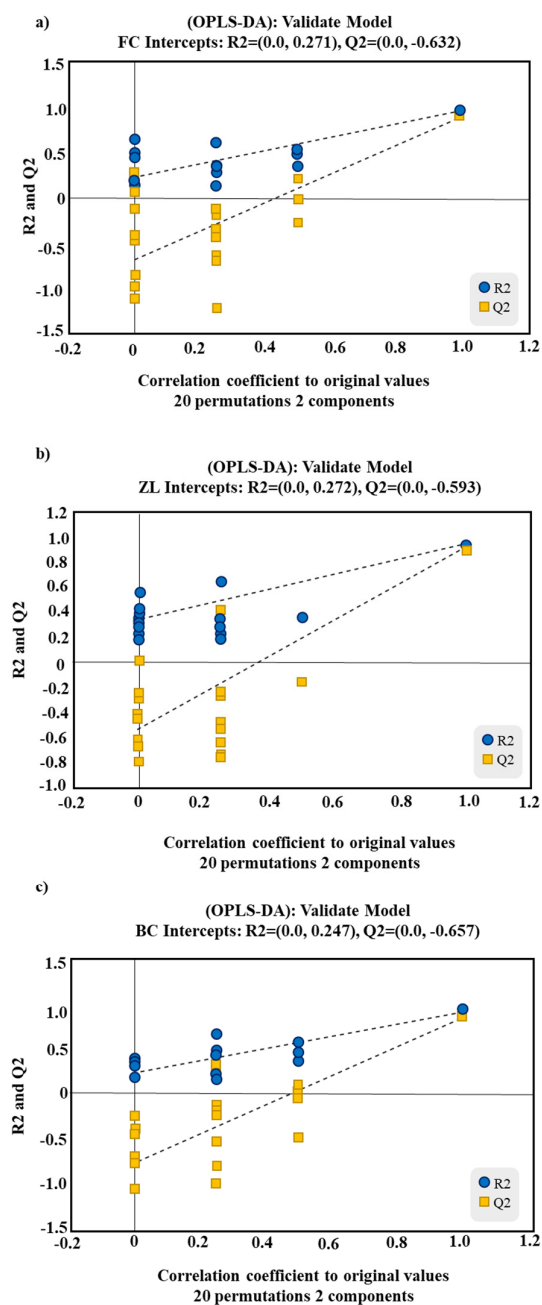

**Figure S2.** Permutation tests of OPLS-DA relative to the olive oil phenolic compounds according to FC (a), ZL (b) and BC (c) treatments.

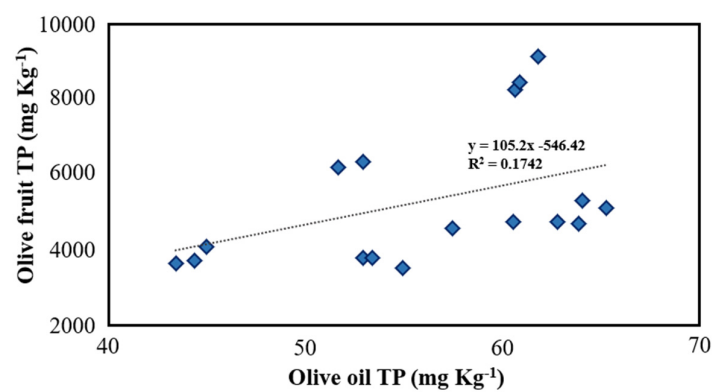

**Figure S3.** Correlation between the olive fruit total phenolic compounds in relation to olive oil phenolic compounds.

**Table S3.** CV-ANOVA respective to the OPLS-DA of olive fruit fatty acids.

| M1(Untitled) | SS      | DF | MS      | F | <i>p</i> | SD      |
|--------------|---------|----|---------|---|----------|---------|
| Total Corr.  | 34      | 34 | 1       |   |          | 1       |
| Regression   | 0       | 12 | 0       | 0 | 1        |         |
| Residual     | 36.6921 | 22 | 1.66782 |   |          | 1.29144 |

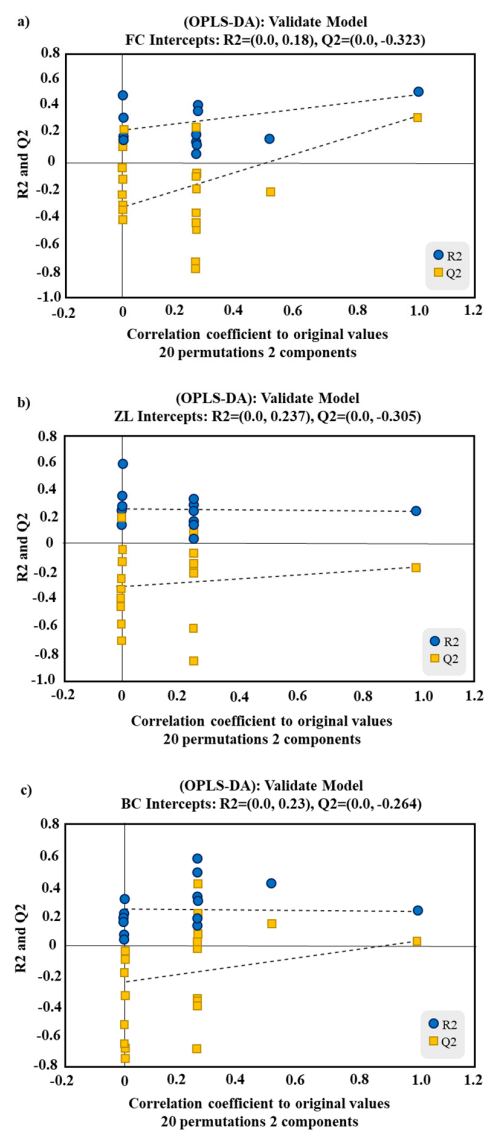

**Figure S4.** Permutation tests of OPLS-DA relative to the olive fruit fatty acids, according to FC (a), ZL (b) and BC (c) treatments.
